# Supplementary material for: Perfluorocarbon regulates the intratumoural environment to enhance hypoxia-based agent efficacy
Source: PubMed Central journal article supplement (PMC6450981; doi:10.1038/s41467-019-09389-2), 2019-04-05
Supplement: 41467_2019_9389_MOESM1_ESM.pdf [file 41467_2019_9389_MOESM1_ESM.pdf]

1 **Supplementary Information**

2 **Perfluorocarbon regulates the intratumoural environment to enhance**  
3 **hypoxia-based agent efficacy**

4 Wenguang Wang<sup>1,2,†</sup>, Yuhao Cheng<sup>1,2,†</sup>, Peng Yu<sup>1,2,†</sup>, Haoran Wang<sup>1,2</sup>, Yue  
5 Zhang<sup>1,2</sup>, Haiheng Xu<sup>1,2</sup>, Qingsong Ye<sup>1,2</sup>, Ahu Yuan<sup>1,2,\*</sup>, Yiqiao Hu<sup>1,2,3,\*</sup>, Jinhui  
6 Wu<sup>1,2,3,\*</sup>

7 **Affiliations:**

8 <sup>1</sup> State Key Laboratory of Pharmaceutical Biotechnology, Medical School of  
9 Nanjing University & School of Life Sciences, Nanjing University, Nanjing  
10 210093, China

11 <sup>2</sup> Institute of Drug R&D, Nanjing University, Nanjing 210093, China

12 <sup>3</sup> Jiangsu Provincial Key Laboratory for Nano Technology, Nanjing University,  
13 Nanjing 210093, China

14 † These authors contributed equally to this work.

15 **\* Corresponding authors:**

16 Jinhui Wu, Ph.D. (Main corresponding author)

17 Email: wuj@nju.edu.cn

18 Yiqiao Hu, Ph.D.

19 Email: huyiqiao@nju.edu.cn

20 Ahu Yuan, Ph.D.

21 Email: yuannju@nju.edu.cn.

22 Phone: +86-25-83596143

23 Address: 22 Hankou Road, Nanjing University, Nanjing 210093, China

24

25 **Supplementary Figures**

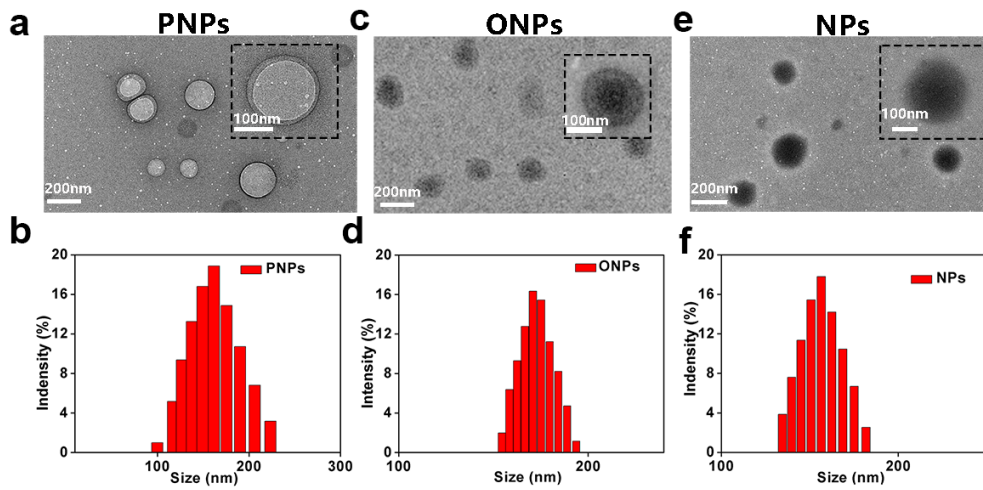

26

27 **Supplementary Fig. 1** The morphology of PNPs (a), ONPs (c) and NPs (e)

28 observed by transmission electron microscopy and their respectively size

29 distributions determined by dynamic light scattering (b, d, f).

30

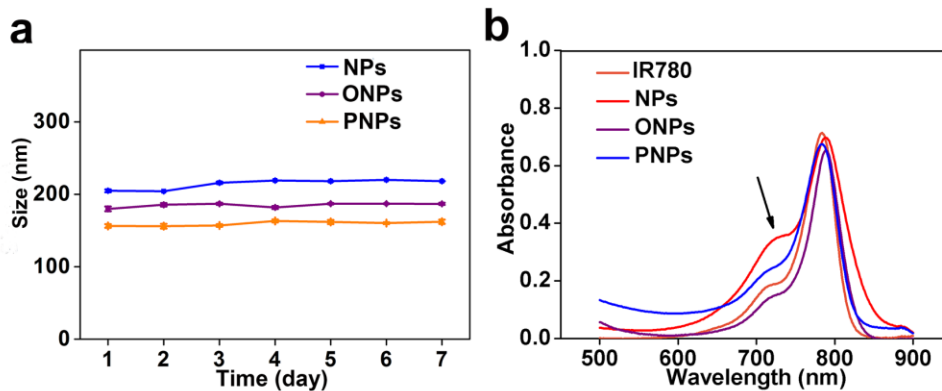

31

32 **Supplementary Fig. 2** (a) Stability of NPs, ONPs and PNPs in PBS at 4 °C.

33 Values are the mean  $\pm$  s.d. ( $n=3$ ) (b) UV-vis spectra of free IR780, NPs, ONPs

34 and PNPs. The black arrow represents the  $\pi$ - $\pi$  stacking shoulder peak of

35 IR780 in NPs.

36

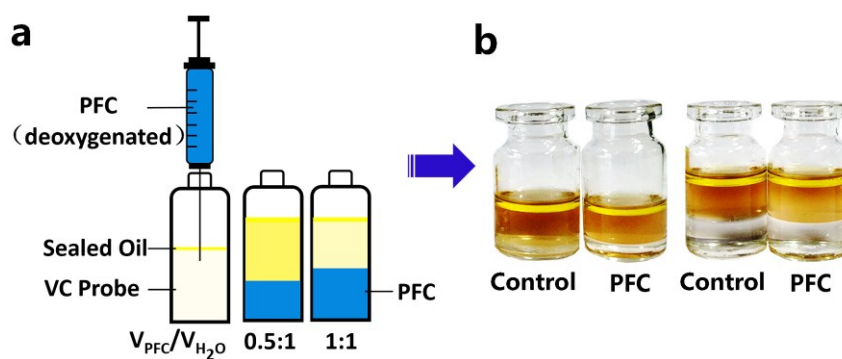

37

38 **Supplementary Fig. 3** Deoxygenated PFTBA mediated  $O_2$  absorption. (a)

39 Schematic diagram of  $O_2$  absorption reflected by the oxidation of vitamin c.

40 Deoxygenated PNPs were added into  $H_2O$  and sealed with oil. (b) The images

41 of vitamin c after deoxygenated PFTBA added. Oxygen concentration was

42 reflected by the brownish color of oxidative vitamin c. The darker the color, the

43 more oxygen.

44

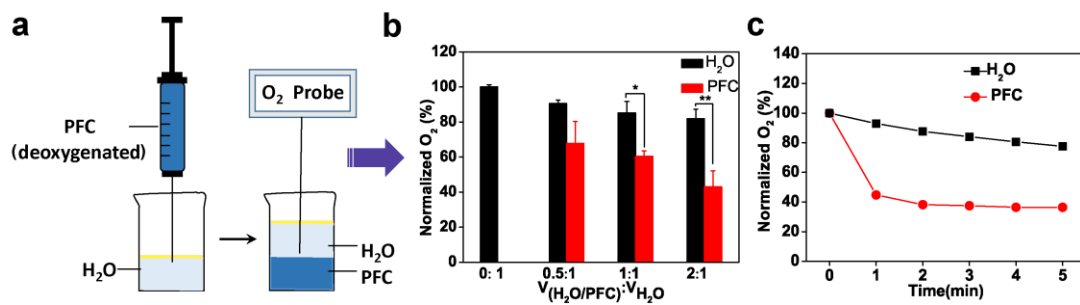

45

46 **Supplementary Fig. 4** Deoxygenated PFTBA mediated O<sub>2</sub> absorption. (a)

47 Schematic diagram of O<sub>2</sub> changes in water. (b) Normalized decrement of O<sub>2</sub> by

48 deoxygenated PFTBA further confirmed the good O<sub>2</sub> absorption of PFTBA.

49 Values are the mean  $\pm$  s.d. ( $n=3$ ). (c) Time dependent O<sub>2</sub> changes monitored

50 by O<sub>2</sub> meter.

51

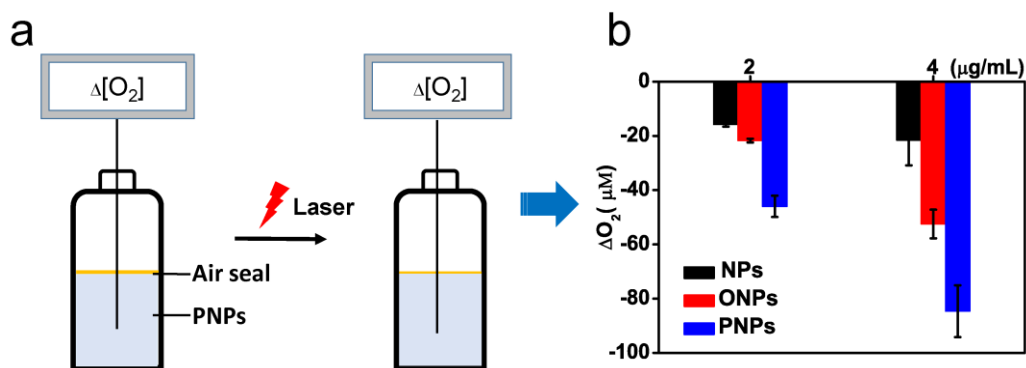

52

53 **Supplementary Fig. 5** (a) The DO (dissolved O<sub>2</sub>) measuring process in water

54 post laser irradiation. PNPs were mixed into H<sub>2</sub>O and sealed with oil. After

55 laser irradiation (808 nm, 400 mW cm<sup>-2</sup>) for 10 min, the DO was measured by

56 O<sub>2</sub> meter; (b) Quantification of DO in water. The change of DO was achieved

57 by the records before and after laser irradiation. The largest O<sub>2</sub> change was

58 achieved in PNPs group. Values are the mean ± s.d. (n=3).

59

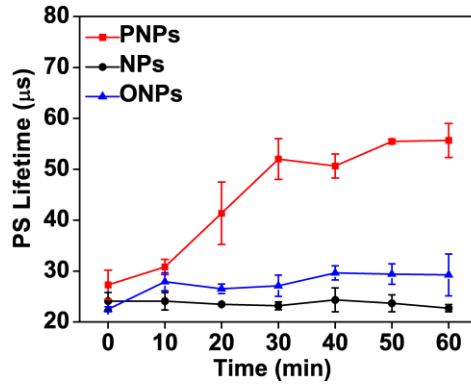

60

61 **Supplementary Fig. 6** Phosphorescence (PS) lifetime profile of  
 62 phosphorescent molecular probe over laser irradiation. The lower PO<sub>2</sub>, the  
 63 longer the PS lifetime. The fact that PNPs produced longer PS lifetime  
 64 indicated that a more hypoxic environment could be achieved by PNPs. Values  
 65 are the means ± s.e.m. (*n*=2).

66



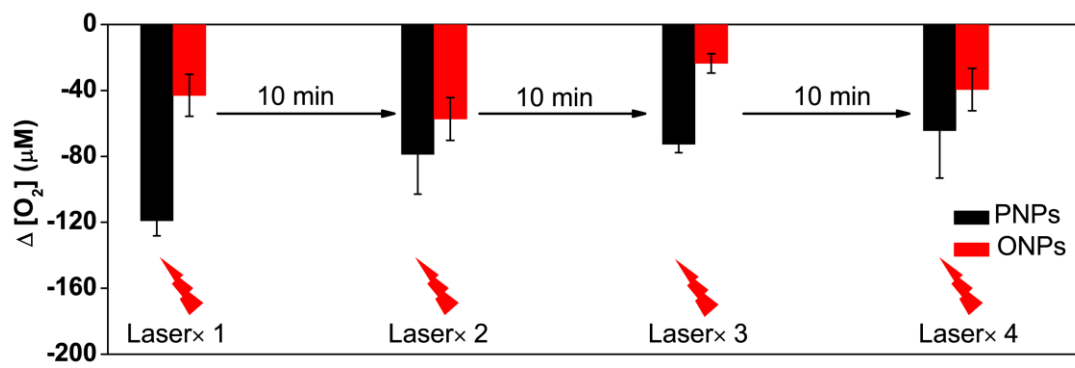

67

68 **Supplementary Fig. 7** Dissolved oxygen variations ( $\Delta [O_2]$ ) of PNPs treated

69 by repeated light/dark cycles. Values are the means  $\pm$  s.d. ( $n=3$ ).

70

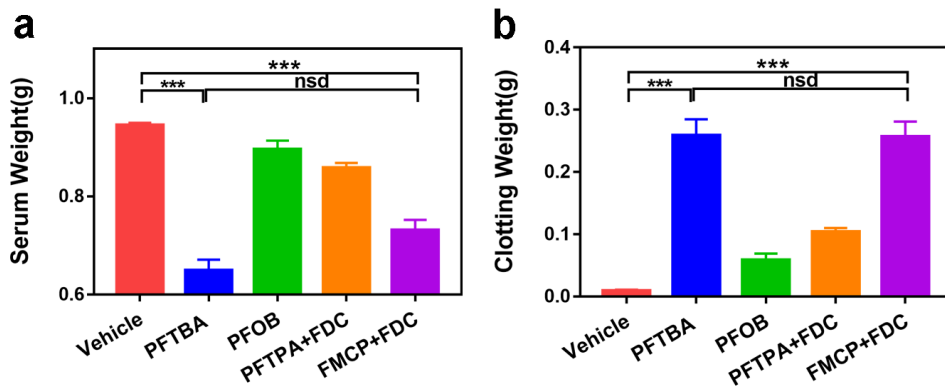

71

72 **Supplementary Fig. 8** The platelet inhibition was evaluated by blood clot

73 retraction. Both serum weight (a) and clotting weight (b) were measured after

74 in vitro incubated with platelet which was pretreated with perfluorocarbons

75 (PFCs) (PFOB: perfluorooctylbromide; PFTPA: perfluorotripropylamine; FDC:

76 perfluorodecalin; FMCP: perfluorocyclohexyl piperidine). Result suggested

77 that PFTBA could inhibit platelets most effectively among those PFCs ( $n \geq 4$ ).

78 Values are the mean  $\pm$  s.d. nsd: no significant difference, \*\*\*  $p < 0.001$

79 (unpaired, two-way  $t$  tests).

80

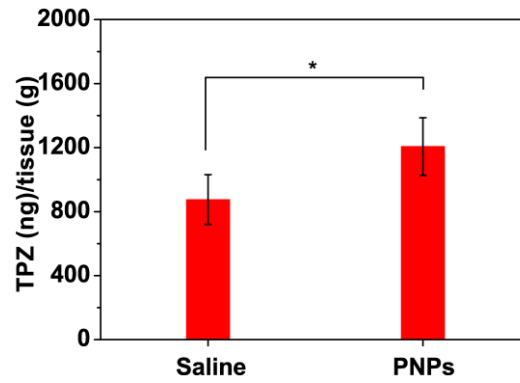

81

82 **Supplementary Fig. 9** The distribution of TPZ in tumour of CT26 bearing mice.

83 TPZ was administrated intravenously at 5 h after PNP were i.v. injected into

84 mice. At 10 h post intravenous administration of TPZ, mice were sacrificed and

85 the level of TPZ in different tissues was measured by high performance liquid

86 chromatography (HPLC). Values are the mean  $\pm$  s.d. (saline,  $n=4$ ; PNP,  $n=5$ )

87 (unpaired, two-way  $t$  tests).

88

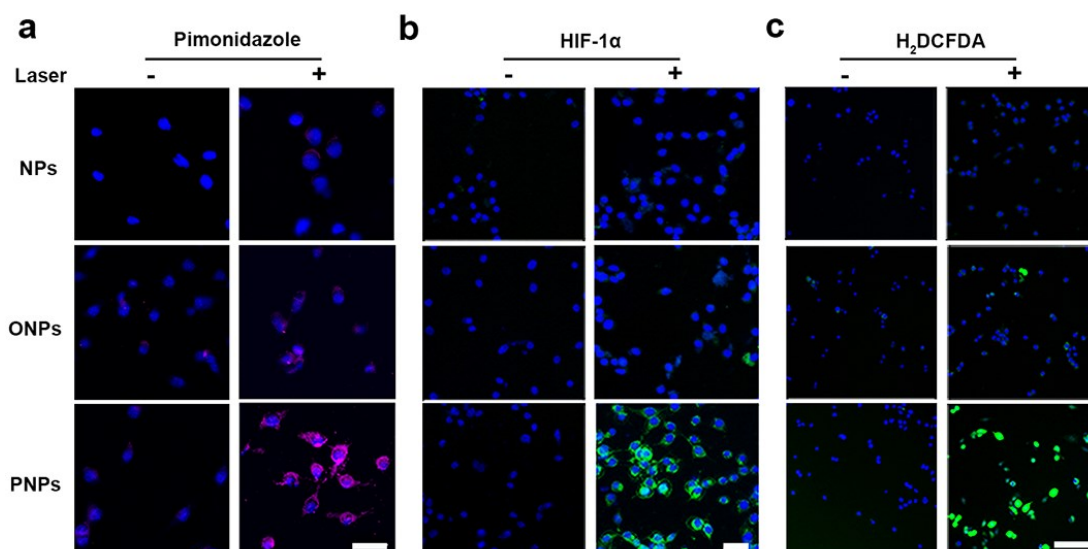

89

90 **Supplementary Fig. 10** Cellular <sup>1</sup>O<sub>2</sub> and hypoxia assays by PNPs and  
 91 irradiation. (a) Fluorescence images of hypoxia (a), HIF-1α (b) and <sup>1</sup>O<sub>2</sub> (c) in  
 92 CT26 cells. Cells were respectively detected by Hypoxia stress detection kit  
 93 (purple; scale bar, 25 μm), HIF-1α antibody (green; scale bar, 50 μm) and  
 94 H<sub>2</sub>DCFDA (green; scale bar, 100 μm) respectively. Nuclei were stained by  
 95 DAPI (blue).

96

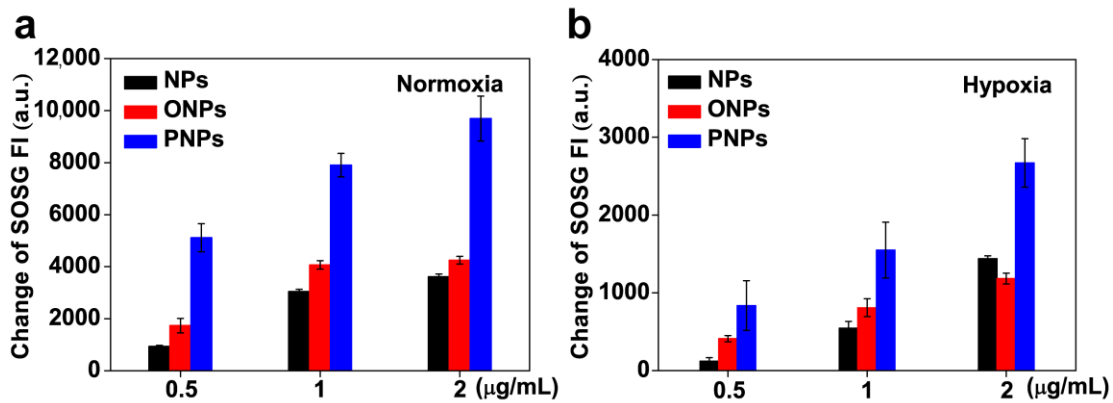

97

98 **Supplementary Fig. 11** Photodynamic efficacies of PNPs. (a-b) Laser

99 stimulated  $^1\text{O}_2$  generation under normoxic (21%  $\text{O}_2$ ) and hypoxic (1%  $\text{O}_2$ )

100 conditions, as determined by the fluorescence intensity of SOSG ( $^1\text{O}_2$  probe,

101  $n=3$ ).

102

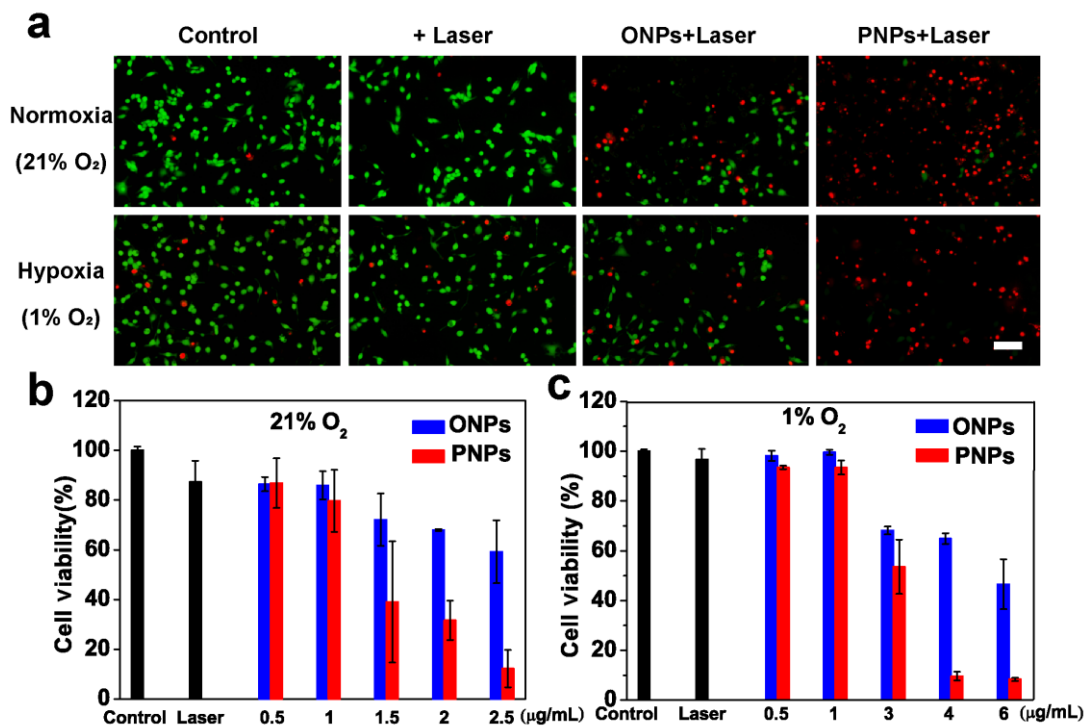

103

104 **Supplementary Fig. 12** Enhanced cytotoxicity by PNPs mediated PDT in  
 105 normoxic and hypoxic conditions. Cells were exposed to intermittent irradiation  
 106 (808 nm, 400 mW cm<sup>-2</sup>) for 30 s x 2 times, and viability was measured by  
 107 AlarmBlue assay and calcein-AM/propidium iodide (PI) staining. (a) Live/dead  
 108 staining of CT26 cells treated with ONPs or PNPs (live cells, green; dead cells,  
 109 red). Scale bar: 100 µm. (b) Cell viability of treated CT26 cells in normoxic  
 110 condition (21% kPa O<sub>2</sub>) and (c) in hypoxic condition (1% kPa O<sub>2</sub>). Values are  
 111 the mean ± s.d (n=3).

112

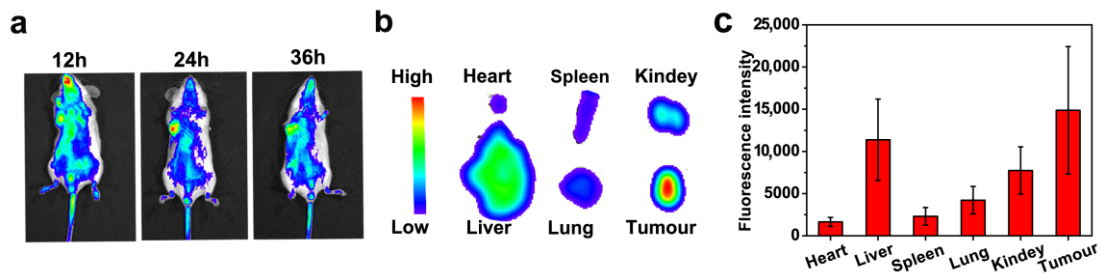

113

114 **Supplementary Fig. 13** Bio-distribution of PNPs. (a) Near-infrared imaging of

115 tumour accumulation of IR780 (PNPs) in CT26-bearing mice after intravenous

116 injection of PNPs. Images were taken at 12, 24 and 36 h post injection. (b)

117 Bio-distribution of PNPs in mice determined by the IR780 fluorescence from

118 tissue at 24 h post injection. (c) Semi-quantitative analysis of IR780 in tumor

119 and tissue after intravenous injection of PNPs. IR780 was determined by NIR

120 fluorescence. Values are the mean  $\pm$  s.e.m. ( $n=4$ ).

121

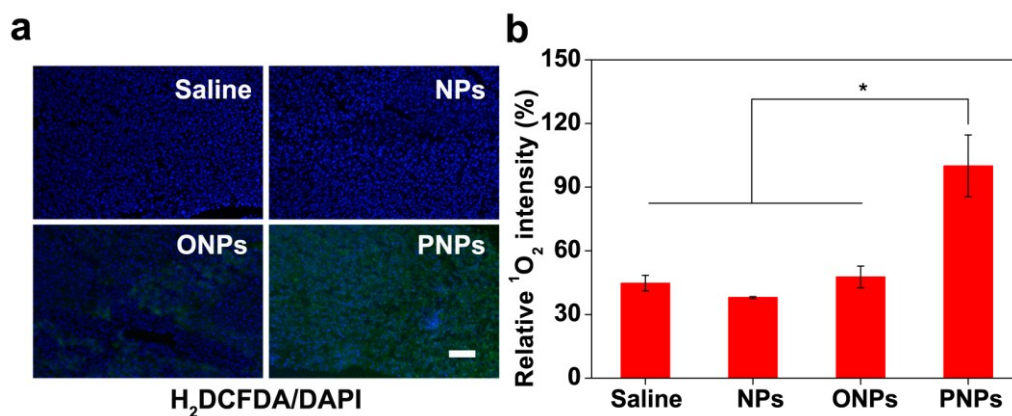

122

123 **Supplementary Fig. 14** (a) Ex vivo Immunofluorescence staining of <sup>1</sup>O<sub>2</sub>

124 detected by H<sub>2</sub>DCFDA (green, scale bar, 200 μm) and their corresponding

125 quantification (b). Values are the mean ± s.e.m. (Saline, *n*=3; NPs, *n*=3; PNPs,

126 *n*=5; ONPs, *n*=6) (unpaired, two-way *t* tests).

127



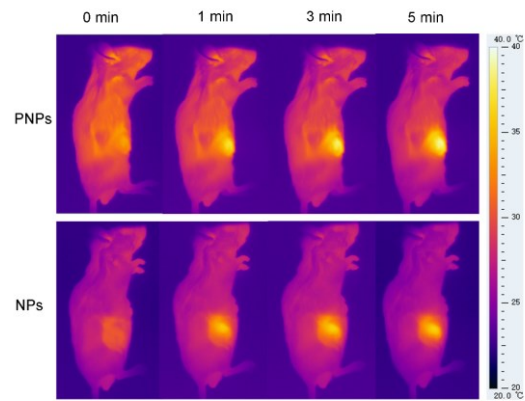

128

129 **Supplementary Fig. 15** IR thermal images of CT26-tumour-bearing mice

130 injected with PNPs and NPs under the 808 nm laser ( $400 \text{ mW cm}^{-2}$  for 5 min)

131 irradiation.

132

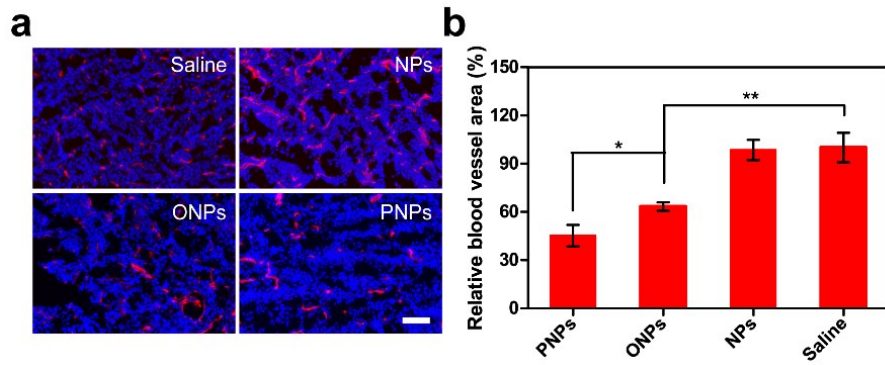

133

134 **Supplementary Fig. 16** Ex vivo immunofluorescence images of tumour

135 vessels post laser irradiation. (a) The tumour vessels and nuclei were stained

136 with anti-CD31 antibody (red) and DAPI (blue), respectively. (b) Quantification

137 of blood vessel densities after irradiation. Values are the mean  $\pm$  s.e.m. (Saline,

138 PNPs, NPs,  $n=5$ ; ONPs,  $n=6$ ) \* $p < 0.05$ , \*\* $p < 0.01$  (unpaired, two-way  $t$  tests).

139

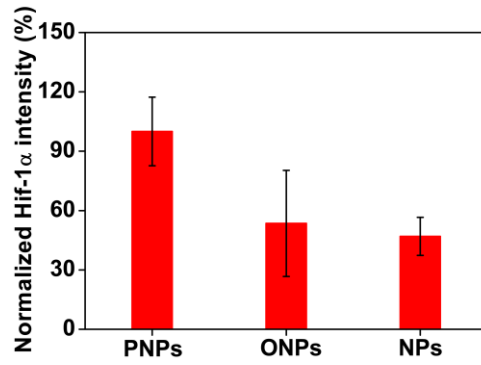

140

141 **Supplementary Fig. 17** The corresponding quantitative levels of HIF-1α  
142 protein (western blot) by the different treatments. The quantitative results were  
143 calculated by protein expressions/actin HIF-1α (For PNPs and NPs,  $n=3$ ; For  
144 ONPs,  $n=2$ ). Values are the mean  $\pm$  s.e.m.

145

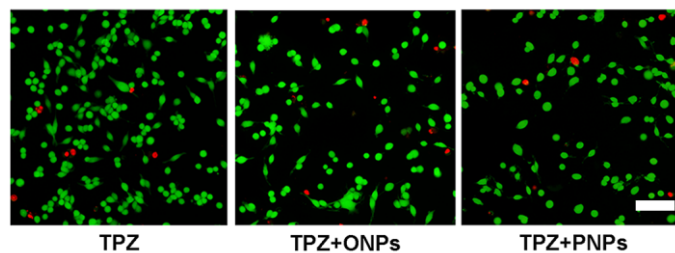

146

147 **Supplementary Fig. 18** Fluorescence images of CT26 cells cultured with TPZ

148 and unoxygenated ONPs or PNPs. Viable cells were stained by calcein-AM

149 (green), and dead/late apoptosis cells were stained by PI (red, scale bar: 100

150  $\mu\text{m}$ ).

151

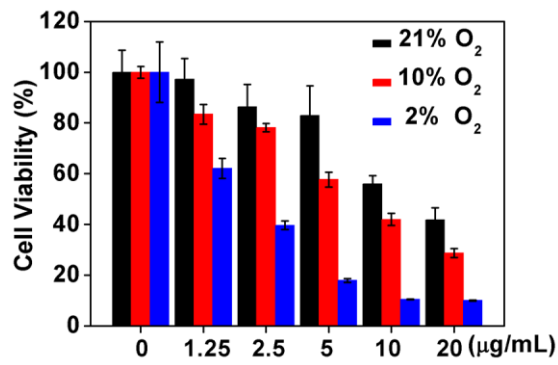

152

153 **Supplementary Fig. 19** Cytotoxicity of treated CT26 cells after co-incubation  
 154 with TPZ for 24 h under different O<sub>2</sub> environments, including 21% kPa O<sub>2</sub>  
 155 (normoxia), 10% kPa O<sub>2</sub> (semi-hypoxia) and 2% kPa O<sub>2</sub> (hypoxia), measured  
 156 by Cell Counting Kit-8 method in vitro. Values are the mean ± s.d. (*n*=6).

157

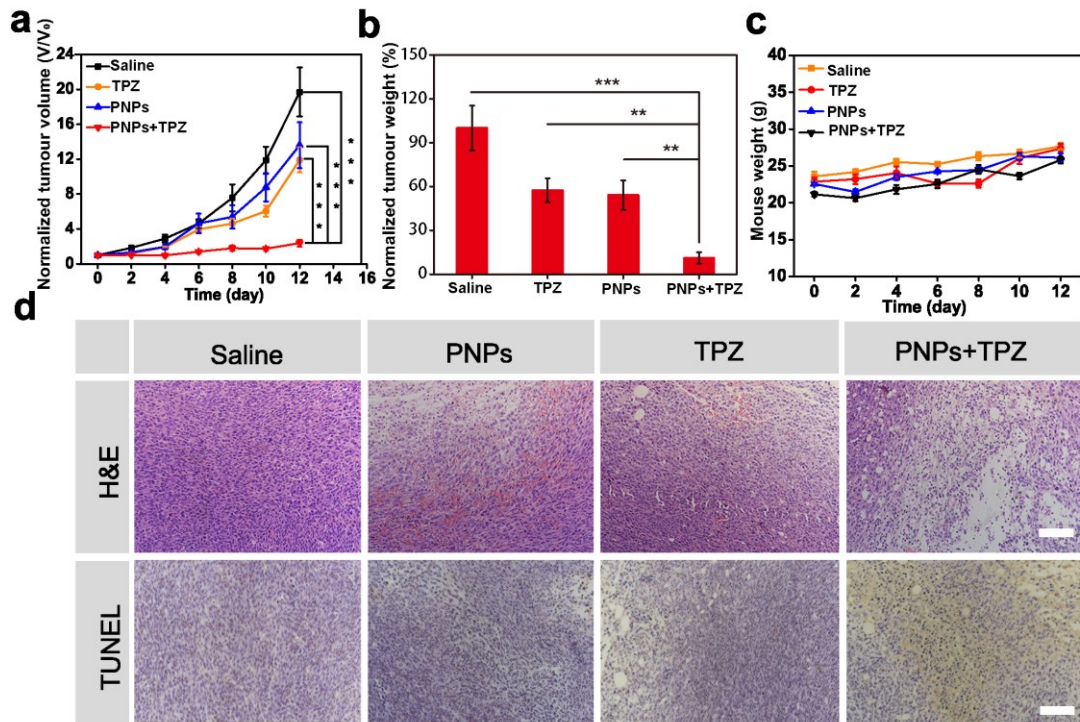

158

159 **Supplementary Fig. 20** PNP-enhanced TPZ chemotherapy. (a) Tumour

160 growth curves of treated mice. ( $n= 5-7$  mice per group). (b) Normalized

161 averages of tumour weights at day 12. (c) Changes of body weight. (d) H&E

162 and TUNEL stained CT26 slices. Samples were collected from different groups

163 at day 2 post administration (scale bars,  $100\ \mu\text{m}$ ). Values are the mean  $\pm$  s.e.m.

164  $*p < 0.05$ ,  $**p < 0.01$ ,  $***p < 0.001$  (unpaired, two-way  $t$  tests).

165

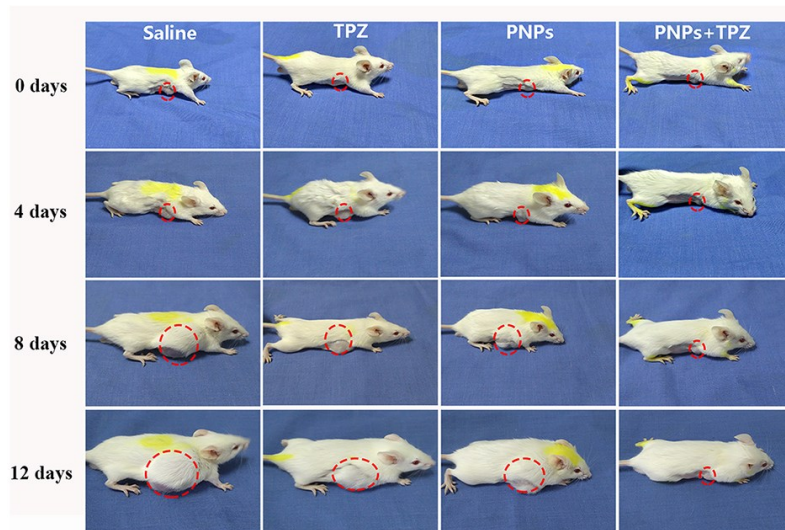

166

167 **Supplementary Fig. 21** Photographs of mice from different groups after  
168 corresponding treatments, including control (saline), free TPZ, PNP and TPZ  
169 plus PNP. All of the groups were exposed to laser (808 nm, 400 mW cm<sup>-2</sup>) for  
170 5 min at 24 h after intravenous administration.

171

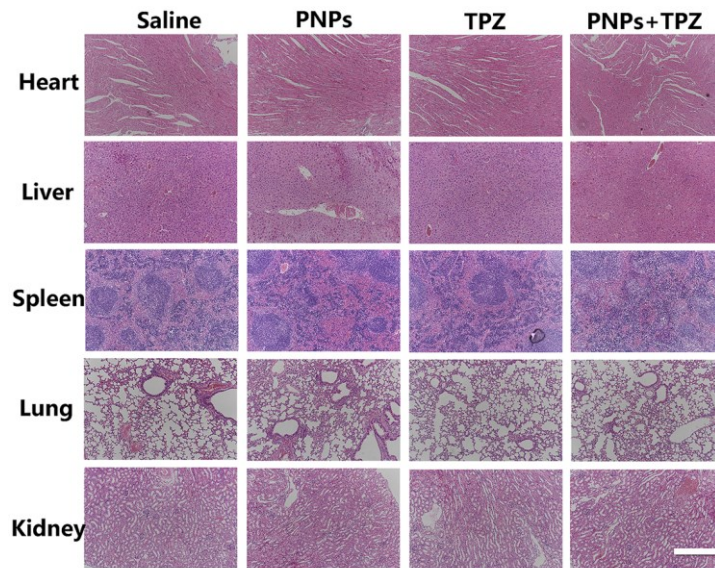

172

173 **Supplementary Fig. 22** Histological analysis of the organs acquired from  
 174 CT26 bearing mice on day 12 post-injection with saline, PNPs, TPZ and PNPs  
 175 plus TPZ (scale bars, 100  $\mu$ m).

176



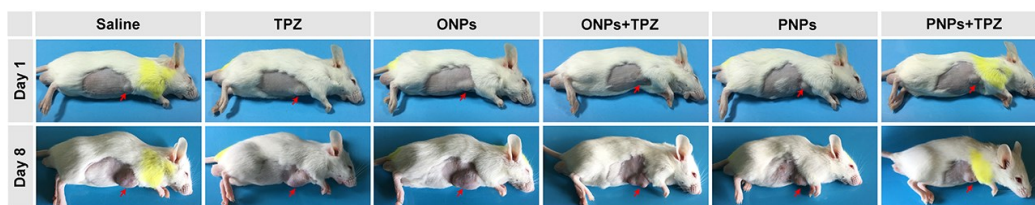

177

178 **Supplementary Fig. 23** Photographs of mice from different groups after

179 corresponding treatments, including control (saline), free TPZ, ONPs, PNPs,

180 TPZ plus ONPs and TPZ plus PNPs. TPZ ( $20 \text{ mg kg}^{-1}$ ) was intravenously

181 injected into mice 3 h before laser irradiation. All of the groups were exposed to

182 laser ( $808 \text{ nm}$ ,  $400 \text{ mW cm}^{-2}$ ) for 5 min at 24 h after intravenous administration

183 of PNPs ( $200 \mu\text{L}$  PNPs,  $(1.4 \text{ mg kg}^{-1} \text{ IR780})$ , 20% v/v PFTBA).

184

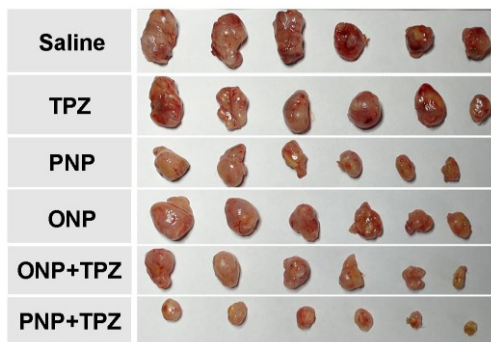

185

186 **Supplementary Fig. 24** Images of tumours after treatments with different  
 187 samples. Treatments as follows: saline, TPZ, ONPs, ONPs plus TPZ, PNPs,  
 188 PNPs plus TPZ. TPZ ( $20 \text{ mg kg}^{-1}$ ) was intravenously injected into mice 3 h  
 189 before laser irradiation. All of the groups were exposed to laser ( $808 \text{ nm}$ ,  $400$   
 190  $\text{mW cm}^{-2}$ ) for 5 min at 24 h after intravenous administration of PNPs ( $200 \text{ }\mu\text{L}$   
 191 PNPs, ( $1.4 \text{ mg kg}^{-1}$  IR780), 20% v/v PFTBA).

192

193

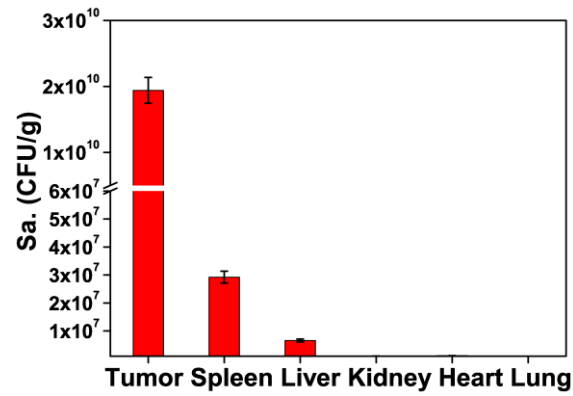

194

195 **Supplementary Fig. 25** In vivo distribution of VNP20009. Tissue distributions  
 196 of VNP20009 in mice which received intravenous injection with PNPs were  
 197 measured by colony forming assay. More VNP20009 accumulated in tumours  
 198 after laser irradiation which were intravenously injected with PNPs, almost  
 199 1000 times than their distribution in spleen. Values are the mean ± s.e.m.  
 200 ( $n=3$ ).

201

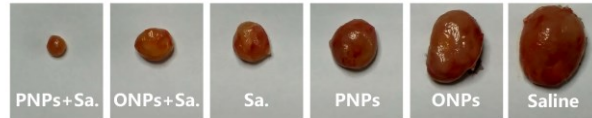

202

203 **Supplementary Fig. 26** Images of tumours after treatments with different  
204 samples. Treatments as follows: saline, Sa., ONPs, ONPs plus Sa., PNP5,  
205 PNP5 plus Sa.. At 24 h post injection, all those tumors were irradiated with  
206 laser (808 nm, 400 mW cm<sup>-2</sup>) for 5 min after intravenous injection of  
207 VNP20009 in related groups. The VNP20009 and PNP5 doses were  $5 \times 10^6$   
208 CFU per mouse and 200  $\mu$ L (1.4 mg kg<sup>-1</sup> IR780, 20% v/v PFC) mouse<sup>-1</sup> in  
209 related groups respectively.

210

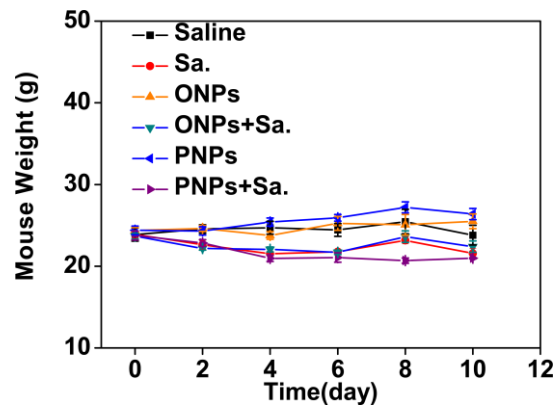

211

212 **Supplementary Fig. 27** The change of body weight in different groups.

213

214

## 215 **Supplementary Methods**

216 **Detection of singlet oxygen in vitro.** SOSG was employed to quantify the  
217 generation of  $^1\text{O}_2$  according to protocol<sup>1</sup>. Briefly, samples (0.1 mL) and SOSG  
218 (50  $\mu\text{M}$ , 0.02 mL) were mixed in 96-well plates (Costar). After laser exposure  
219 (808 nm, 2 W  $\text{cm}^{-2}$ ), the oxidized SOSG was detected using a multifunctional  
220 microplate reader by measuring the fluorescence intensity ( $E_x/E_m = 504/525$   
221 nm). To confirm whether the  $^1\text{O}_2$  generation was related to  $\text{O}_2$  levels, samples  
222 were kept in transparent box under different  $\text{O}_2$  partial pressure conditions,  
223 respectively (1% and 21% kPa  $\text{O}_2$ ), then oxidized SOSG with 20 s laser  
224 irradiation was also quantified by measuring the fluorescence intensity.  
225 Experiments for each group were run in triplicate.

226 Carboxy- $\text{H}_2\text{DCFDA}$  was employed as a ROS indicator to monitor intracellular  
227 ROS by fluorescence microscopy (Nikon, Japan). CT26 cells were seeded  
228 with a density of  $5 \times 10^3$  per well in 96-well plates. After the cells were  
229 incubated for 24 h, different samples with the final concentration of IR780 of 4  
230  $\mu\text{g}/\text{mL}$  were added to each well. Then, the cells were further incubated for 30  
231 min at 37  $^\circ\text{C}$  and 5%  $\text{CO}_2$ . The cells were incubated with 100  $\mu\text{L}$  per well  
232 carboxy- $\text{H}_2\text{DCFDA}$  (25 mM) for 30 min after washing once with PBS.  
233 Subsequently, the cells were washed with PBS and irradiated by laser  
234 exposure (808 nm, 2 W  $\text{cm}^{-2}$ ) for two consecutive 10 s exposures. An 1 minute  
235 interval was added between the two irradiations for avoiding high temperature.  
236 Then, the cells were labelled with 100  $\mu\text{L}$  Hoechst 33342 (1 mM) for 5 min. The  
237 fluorescence emission spectrum of carboxy-  $\text{H}_2\text{DCFDA}$  ( $E_x/E_m = 495/529$  nm)  
238 and Hoechst 33342 ( $E_x/E_m = 350/461$  nm) were immediately performed on a  
239 fluorescence microscope (Nikon, Japan).

240  **$\text{O}_2$  consumption rate assay by TRF.**  $\text{O}_2$  consumption rate was measured by  
241 MitoXpress Kit (Cayman Chemical) according to the procedure provided by the  
242 manufacturer. DPBF was added as a quencher of  $^1\text{O}_2$  because the MitoXpress

243 probe can be oxidized by  $^1\text{O}_2$  irreversibly. Briefly, 150  $\mu\text{L}$  PNPs solution (8  $\mu\text{g}$   
244  $\text{mL}^{-1}$  IR780, 4% v/v PFTBA) and 10  $\mu\text{L}$  DPBF (0.1 mM) were placed in a  
245 96-well plate, covered with mineral oil according to the manufacturer's protocol,  
246 then samples were exposed to laser (808 nm, 400  $\text{mW cm}^{-2}$ ) for 5 min. Then  
247 MitoXpress probe (10  $\mu\text{L}$ ) was added into the mixed solution for measurement.  
248 The 96-well plate was detected by a microplate reader with the  
249 excitation/emission wavelength of 530/585 nm. Each sample was irradiated  
250 repeatedly every 1 minute, then measured every 10 minutes, with two readings  
251 at delay times of 30 and 70  $\mu\text{s}$  and a gate time of 30  $\mu\text{s}$ . Acquired  
252 time-resolved fluorescence (TR-F) intensity signals were converted into the  
253 phosphorescence lifetime (microsecond)  $[\tau]$  values by the formula:  $\tau =$   
254  $(70-30)/\ln(F_1/F_2)$ , where  $F_1$  and  $F_2$  are the TR-F signals at the delay times of  
255 70 and 30  $\mu\text{s}$  separately.  $\text{O}_2$  concentration of the sample was reflected by the  
256 phosphorescence lifetime  $[\tau]$ . For other samples, procedure was performed  
257 similarly.

258 **Western blot analysis of HIF-1 $\alpha$  protein in tumour.** Tumour bearing mice  
259 injected with different samples intravenously were exposed laser (808 nm, 400  
260  $\text{mW cm}^{-2}$ ) for 5 min, then those tumours were washed with ice-cold PBS and  
261 ground in 4 mL extract buffer on ice for 30 minutes. Using a micro-centrifuge,  
262 the extract was spun down at a rate of 10000  $\text{xg}$  for 5 min at 4  $^\circ\text{C}$ , and the  
263 lysate was acquired for further analysis of corresponding proteins. Then,  
264 proteins were resolved using SDS-polyacrylamide gel electrophoresis and  
265 transferred onto a PVDF membrane. Membrane was then incubated with dilute  
266 solution (1:1000) of anti-HIF-1 $\alpha$  and anti-actin antibody which was used to  
267 detect the actin proteins as loading control for whole-cell lysate after blocked  
268 with 0.05% tween 20 and 5% skimmed milk in PBS. All the antibodies were  
269 purchased from Wuhan servicebio technology Co., Ltd. The results of western  
270 blot were performed to visualize using the chemiluminescence technology. In  
271 addition, corresponding quantifications were measured by the Alpha software.

272 **In vitro analysis of PFC acting as an  $\text{O}_2$  sponge.** Qualitative analysis:  
273 Oxidation discoloration of VC was employed to illustrate the effect of  $\text{O}_2$

274 absorption by nano-PFC. Briefly, 5 mL VC solution was added to vial (final  
275 concentration,  $10 \mu\text{g mL}^{-1}$ ). Different volumes of PFC ( $\text{CCl}_4$ ) were added after  
276 0.1 mL NaOH (0.1 mM) was mixed.  $\text{O}_2$  concentration in VC solution was  
277 reflected by the color of VC solution. Similarly, for quantitative analysis,  
278 different volume of deoxygenated PFTBA ( $\text{H}_2\text{O}$ ) was added into three groups  
279 with the final ratios between PFTBA ( $\text{H}_2\text{O}$ ) and  $\text{H}_2\text{O}$  were 0.5:1, 1:1 and 2:1  
280 (v/v) respectively. Then the change of DO was monitored by  $\text{O}_2$  microelectrode.  
281 Time dependent DO change was also monitored in which the terminal ratio  
282 between PFC ( $\text{H}_2\text{O}$ ) and  $\text{H}_2\text{O}$  was 1:1.

283 **In vitro cytotoxicity.** Cytotoxicity was assessed by AlarmBlue assay and  
284 calcein-AM / propidium iodide (PI) staining. Firstly, we evaluated the  
285 cytotoxicity of PDT under hypoxic and normoxic conditions. Briefly, the CT26  
286 cells ( $5 \times 10^3$  cells per well) were treated with PNPs with different  
287 concentrations for 2 h under different hypoxia atmosphere (1%, 21% kpa  $\text{O}_2$ ).  
288 Then cells were immediately exposed to laser (808 nm,  $400 \text{ mW cm}^{-2}$ ) for (30 s  
289 x 2) with an interval of 1 minute. After co-incubation for 2 h, the drugs were  
290 removed and fresh culture medium was added. Finally, the fluorescence  
291 intensity of AlarmBlue assay was measured (Ex/Em = 530/585 nm). To verify  
292 the cytotoxicity of TPZ under hypoxia atmosphere, the protocol was similar as  
293 above. The cells were treated with free TPZ at different concentrations for 24 h  
294 under different hypoxic atmosphere (1%, 10%, 21%  $\text{O}_2$ ). Then the CT26 cells  
295 were mixed with the solution which consists of alarma blue ( $10 \mu\text{L}$ ) and fresh  
296 medium ( $100 \mu\text{L}$ ) each well, these cells were incubated for another 2 h at  $37^\circ\text{C}$   
297 and 5%  $\text{CO}_2$  atmosphere. Finally, the fluorescence intensity was measured  
298 using a fluorescence microplate. The enhanced cytotoxicity of TPZ  
299 chemotherapy by PNPs in vitro was also assessed with the similar treatments  
300 of TPZ. For calcein-AM and PI assesses, the same treatments: ( $4 \mu\text{g mL}^{-1}$   
301 IR780, 3% v/v PFC) were employed to detect live/dead cells, cells were  
302 stained with calcein-AM and PI for 15 min. Fluorescence images of cells were  
303 captured from the fluorescence microscope (Nikon, Japan) at an excitation of  
304 535 nm and an emission of 600-680 nm.

305 **In vitro blood clot retraction.** Blood clot retraction was employed to evaluate  
306 the influence of PFCs on platelet aggregation. Briefly, mice ( $n=7$ ) was



307 intravenously injected with PFTBA@HSA and saline. Blood was taken from  
308 eyes at 10 h post injection and centrifuged at  $800 \text{ xg min}^{-1}$  for 10 min, and the  
309 upper platelet-rich plasma was taken. The remaining samples was then  
310 centrifuged at  $3000 \text{ xg min}^{-1}$  for 10 min, and the lower layer was employed as  
311 the erythrocyte layer. 200  $\mu\text{L}$  platelet-rich plasma and 5  $\mu\text{L}$  of red blood cells  
312 were diluted to 1 mL with Tyrodes-HEPES. Then those samples was added  
313 with  $1 \text{ U mL}^{-1}$  ( $100 \text{ U mL}^{-1}$  add 10  $\mu\text{L}$ ) of thrombin and inserted with a capillary.  
314 Serum and clotting weight was measured after they were placed at room  
315 temperature for 90 min.

316 **In vivo fluorescence imaging.** For fluorescence imaging, Balb/c bearing  
317 CT26 mice were intravenously injected with 200  $\mu\text{L}$  PNPs ( $1.4 \text{ mg kg}^{-1}$  IR780,  
318 20% v/v PFC). Then, fluorescence images of mice were captured by CRI  
319 maestro system using a 710 nm excitation wavelength. The images and  
320 fluorescence intensity were calculated by the maestro software. All of the mice  
321 were euthanized after 36 h imaging with the lower fluorescence intensity of 36  
322 h than that of 24 h.

323 **Detection of ROS in vivo.** Carboxy- $\text{H}_2\text{DCFDA}$  was employed to measure the  
324 generation of ROS in vivo. It acts as a fluorescent probe (green) in the  
325 presence of ROS. Briefly, 200  $\mu\text{L}$  samples ( $1.4 \text{ mg kg}^{-1}$  IR780; 20% v/v PFTBA,)   
326 were intravenously injected into the CT26 tumour-bearing mice. At 24 h post  
327 injection, all of those mice were intratumorally injected with 50  $\mu\text{L}$   
328 Carboxy- $\text{H}_2\text{DCFDA}$  (25 mM). Then those mice were irradiated with laser (808  
329 nm,  $400 \text{ mW cm}^{-2}$ ) for 5 min. The fluorescence emission spectrum of  
330 carboxy- $\text{H}_2\text{DCFDA}$  (Ex/Em = 495/529 nm) and Hoechst 33342 (Ex/Em =  
331 350/461 nm) were immediately performed on a fluorescence microscope  
332 (Nikon, Japan).

333 **Photothermal effect of PNPs in vivo.** To evaluate the photothermal effect of  
334 PNPs in vivo, the CT26 tumor-bearing mice were intravenously injected with  
335 samples ( $1.4 \text{ mg kg}^{-1}$  for IR780,) when the tumour volumes reached 80~100  
336  $\text{mm}^3$ . At 24 h post injection, all the mice were exposed to 808 nm laser  
337 irradiation ( $400 \text{ mW cm}^{-2}$ ) for a total of 5 min. The IR images were captured by

338 IR imaging devices (FOTRIC) at 0, 1, 3 and 5 min.

339 **Bio-distribution of TPZ in CT26 tumour.**

340 TPZ@PLGA was synthesized according to previous study. When tumour  
341 volume was reach around 150-200 mm<sup>3</sup>, PNPs were first intravenously  
342 injected into mice at the dose of 200 µL (1.4 mg kg<sup>-1</sup> IR780; 20% PFC, v/v).  
343 TPZ@PLGA was then injected into mice intravenously 5 h post PNPS injection.  
344 Mice were sacrificed 10 h after TPZ@PLGA injection. 0.1 g tumour tissues  
345 were homogenized. 1 mL normal saline was added to the wet tissue and  
346 homogenized for 5 min. The samples (400 µL) were transferred to a 1.5 mL  
347 eppendorf tube and mixed with 800 µL methanol. The mixture was vortexed  
348 well and then centrifuged for 10 min at 15,000 xg. The supernatant was  
349 injected to HPLC for analysis.

350 **Assessment of tumour vessels post PDT.**

351 The anti-mouse CD31 antibody (Bio-legend, 102508) was used to measure the  
352 densities of tumour vessels past PDT. Briefly, 200 µL samples (PNPs [1.4 mg  
353 kg<sup>-1</sup> IR780; 20% v/v PFTBA], ONPs, NPs or saline) was injected intravenously  
354 into the mice when the CT26 tumour diameter reached 6-8 mm. Then, the  
355 tumours were irradiated (808 nm, 400 mW cm<sup>-2</sup>) for 5 min at 24 h  
356 post-administration. 3 h later, the mice were sacrificed, and the tumour slices  
357 was prepared for ex vivo immunofluorescence staining of tumour vessels  
358 (anti-mouse CD31 antibody, dilution at 1:500). Finally, the sections were  
359 imaged using a digital microscope (Nikon, Japan).

360 **PNPs enhanced TPZ chemotherapy in vivo.** Male balb/c mice bearing 60-80  
361 mm<sup>3</sup> CT26 tumours were randomly divided to 4 groups (*n* = 6-7). The  
362 treatment scheme was as listed: 1. saline, 2. PNPs, 3. TPZ, 4. PNPs plus TPZ.  
363 PNPs (1.4 mg kg<sup>-1</sup> IR780; 20% v/v PFTBA) were injected intravenously and  
364 TPZ (1mg kg<sup>-1</sup>) was injected intratumourally 3 h before laser exposure. All  
365 tumours were irradiated by laser (808 nm, 400 mW cm<sup>-2</sup>) for 5 min at 24 h post  
366 administration of PNPs. The lengths (L) and widths (W) of tumours were  
367 recorded every two days using a digital caliper, volume (V) was calculated  
368 according to this formula:  $V = L \times W^2/2$ . Relative tumour volume was calculated  
369 as  $V/V_0$  ( $V_0$  is the initial tumour volume before treatments). Mice were  
370 sacrificed at day 12 and tumours from each group were weighted. Liver, spleen,  
371 kidney, heart, and lung from each group were collected, fixed with 4%  
372 paraformaldehyde solution for a day, mounted with paraffine, sliced, stained  
373 with hematoxylin and eosin (H&E), acquired by a digital microscope (Nikon,  
374 Japan). The therapeutic effects of those different treatments were also  
375 evaluated by H&E and TUNEL assays, but mice from each group were  
376 sacrificed 2 days after laser exposure.

377

378 **References**

- 379 1. Lin, H. et al. Feasibility study on quantitative measurements of singlet oxygen generation  
380 using singlet oxygen sensor green. *J Fluoresc* **23**, 41-47 (2013).

381
